# Supplementary material
Source: PubMed Central journal article supplement (PMC2863240)

**Supplemental Figure 1: Different HDAC inhibitors block adipogenesis in 3T3-L1 cells and TSA induces redistribution of C/EBP $\beta$  in transcriptionally inactive chromatin regions.** (A-D) Treatment of pre-adipocytes (3T3-L1 cells) with a hormone inducer cocktail for 8 days leads to effective adipogenesis, which can be monitored by staining with ORO. The HDAC inhibitors Scriptaid and SAHA block adipocyte differentiation in a dose-response manner. Sodium butyrate, a short chain fatty acid, does not inhibit adipogenesis. Transcriptional profiling of adipogenic marker genes shows that treatment of 3T3-L1 cells with Scriptaid or SAHA (but not sodium butyrate) blocks the activation of the transcription of PPAR $\gamma$  but does not reduce the extent of the upregulation of SREBP-1c or C/EBP $\beta$  transcription. (E) Immunofluorescence shows redistribution of C/EBP $\beta$  in the nucleus of TSA-treated 3T3-L1 cells after 18 h of induction of differentiation. We hypothesize that HDAC inhibitors, such as TSA can block adipogenesis in 3T3-L1 cells induced to differentiate by affecting the acetylation state of C/EBP $\beta$ , consequently causing C/EBP $\beta$  to be sequestered in transcriptional inactive chromatin regions.

**A**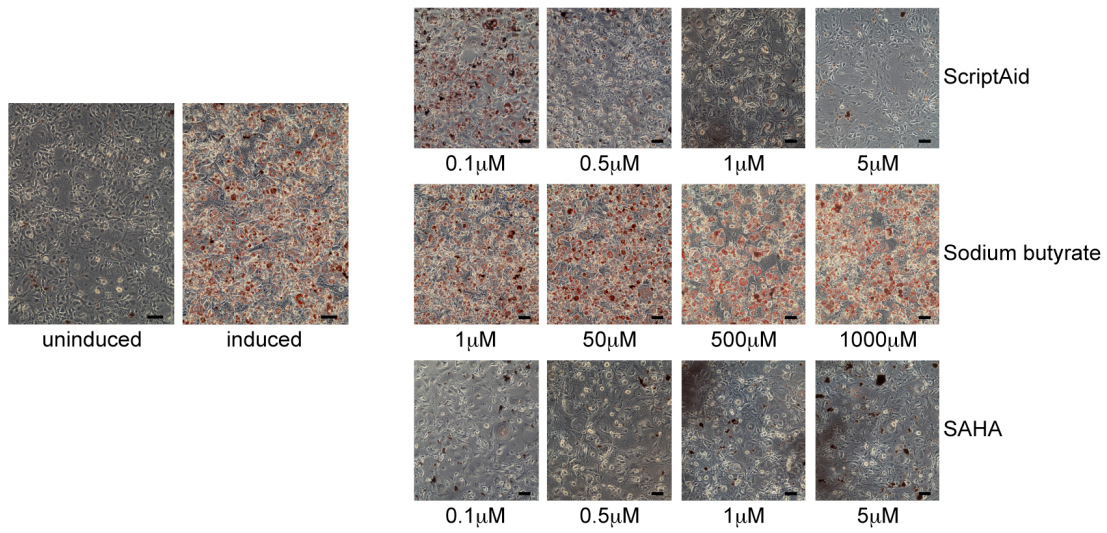**B**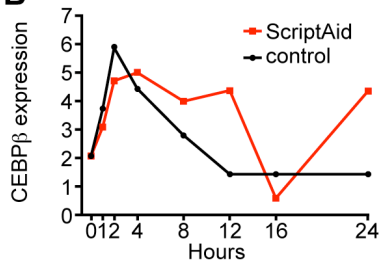**C**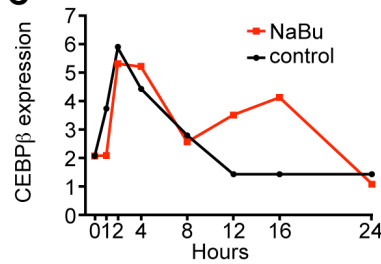**D**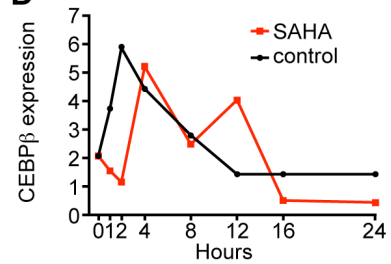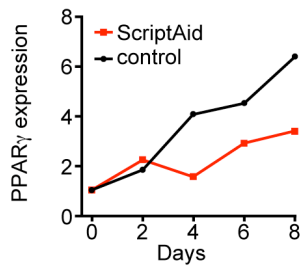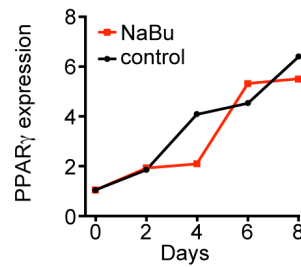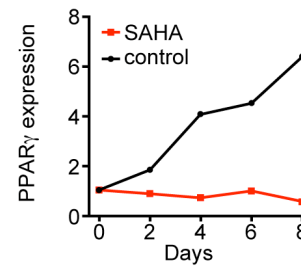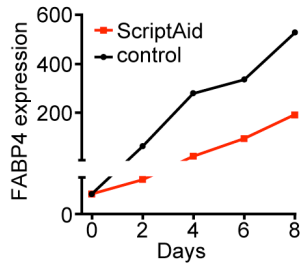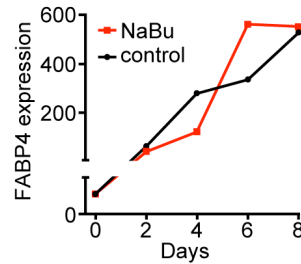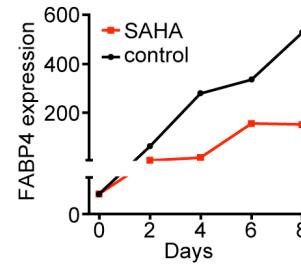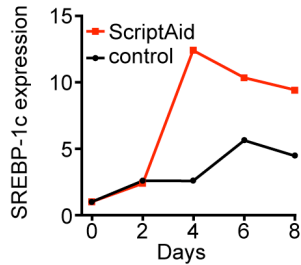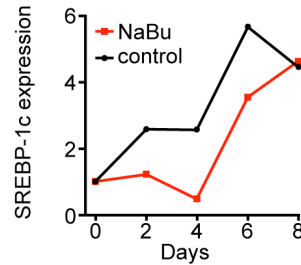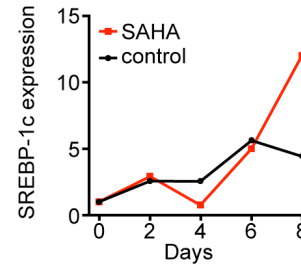**E**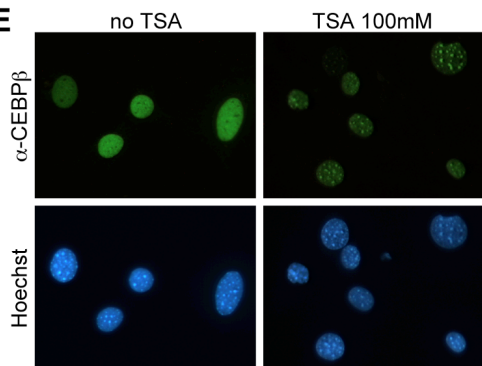

Supplement: supp_M109.081679_Supplemental.pdf [file supp_M109.081679_Supplemental.pdf]
